# Supplementary material
Source: PubMed Central journal article supplement (PMC2280036)

SUPPLEMENTARY FIGURE

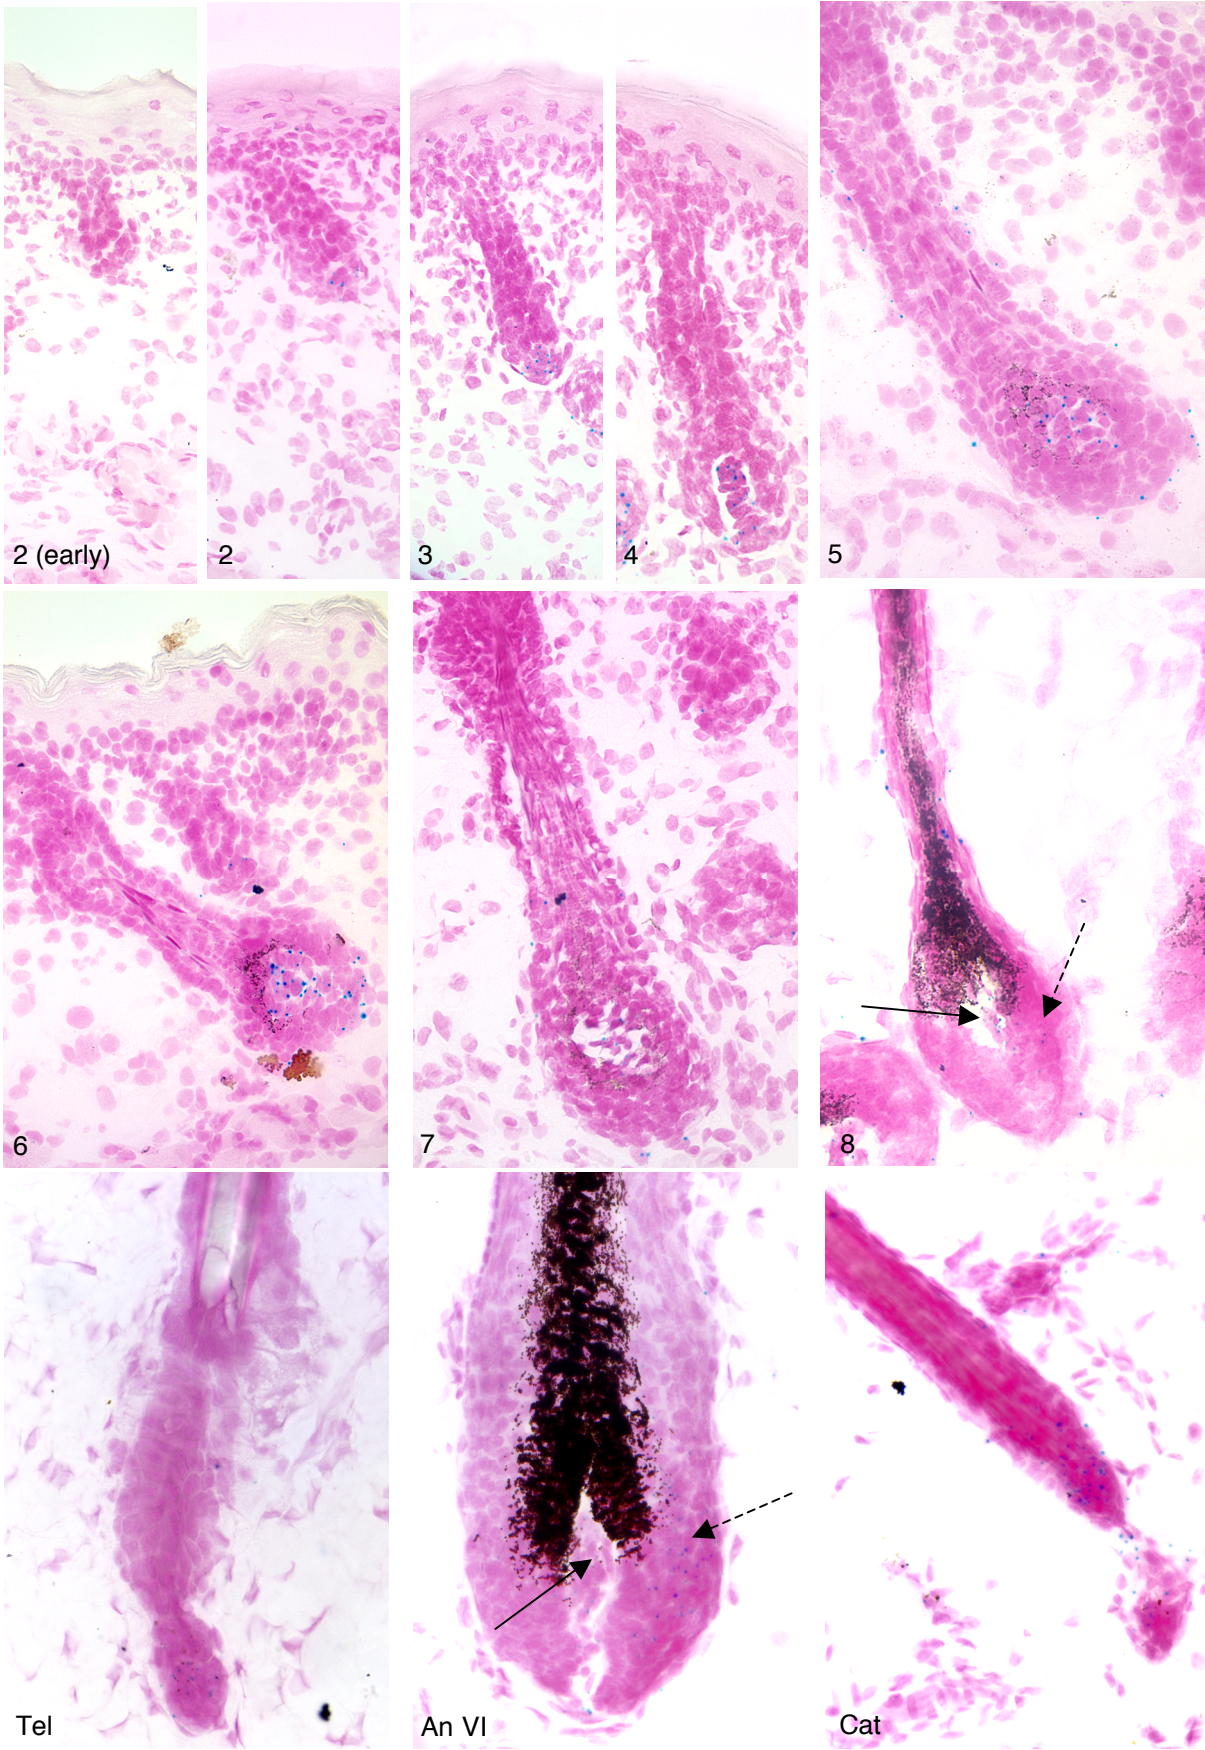

Supplement: NIHMS43186-supplement-01.pdf [file NIHMS43186-supplement-01.pdf]
